# Supplementary material for: Diagnostic performance of serum interferon gamma, matrix metalloproteinases, and periostin measurements for pulmonary tuberculosis in Japanese patients with pneumonia
Source: PLoS One. 2020 Jan 9;15(1):e0227636. doi: 10.1371/journal.pone.0227636 (PMC6952104; doi:10.1371/journal.pone.0227636)
Supplement: S1 File — (XLSX) [file pone.0227636.s004.xlsx]

## Sheet: data summary
Disease	age	male gender	ILD	asthma	COPD	BE	malignancy	cardiovascular	CKD	chronic liver disease	hemodialysis	DM	HIV	immunosuppressant	bilateral	extensive	pleural effusion	cavity	peri	MMP-1	MMP-9	IL-17A	INF-γ	TNF	IL-10	IL-6	IL-4	IL-2
TB	84	0	0	0	0	0	0	0	0	0	0	0	0	0	0	0	0	0	105.12	0	2.586	0	0.24	0	0.96	6.36	0	0
TB	60	0	0	0	0	0	0	0	0	0	0	0	0	0	0	0	0	0	118.08	0	2.376	0	0	0	0.6	4.56	0.84	1.56
TB	85	0	0	0	0	0	0	0	0	0	0	0	0	0	1	1	0	0	280.36	0	2.868	0	22.56	0	1.32	57.24	0	1.56
TB	28	0	0	0	0	0	0	0	0	0	0	0	0	0	1	1	0	1	87.08	0	8.919	0	9.48	2.4	0	28.8	6	1.08
TB	87	0	0	0	0	0	0	1	1	0	0	0	0	0	0	1	0	0	206.8	0	0.123	0	10.32	0	27.72	1529.16	0	0
TB	72	0	0	0	0	0	0	0	0	0	0	0	0	0	1	1	0	0	193.08	0	0	0	0	7.08	2.76	9.36	0	0
TB	49	1	0	0	0	0	0	0	0	0	0	1	0	0	1	1	0	0	56.8	0	0.333	0	3.48	2.76	1.08	9.12	4.2	0.12
TB	69	1	0	0	0	0	0	0	0	0	0	0	0	0	1	1	0	1	292.64	0	4.944	26.72	9.36	0	2.28	39.12	0	0
TB	75	1	0	0	0	0	1	0	0	0	0	1	0	1	1	1	1	0	233.48	0.0301	9.495	0	18.28	0	1.44	18.8	0	0
TB	74	1	0	0	1	0	0	0	0	0	1	0	0	0	0	1	0	0	137.56	0	6.551	21.8	2	0	0.2	57.88	2.6	0
TB	73	0	1	0	0	0	0	0	0	0	0	1	0	1	0	0	0	0	105.84	0	7.126	19.6	4.6	2.36	1.56	52.24	0.12	0.6
TB	78	1	0	0	1	0	0	0	0	0	0	0	0	0	0	0	0	0	100.76	0	10.012	23.08	0	0	1.76	18.36	0	0
TB	77	1	0	0	0	0	0	0	0	0	1	1	0	0	0	1	1	0	1016.76	0.0307	0.979	0	7.96	0	2.04	89.52	0	0
TB	58	1	0	0	0	0	0	0	0	0	0	0	0	0	1	1	0	1	279.64	0.1201	10.41	0	3.48	0.56	1.32	205.4	0	0.88
TB	88	1	0	0	0	0	0	1	1	0	0	0	0	0	1	1	1	0	150.56	0.0589	1.249	0	0.2	0	1.76	29.96	0	0
TB	84	1	0	0	0	0	0	0	0	0	0	0	0	0	1	0	0	0	29.36	0.2164	2.399	0	1.96	0	0.32	44.84	2.16	0
TB	46	0	0	0	0	0	0	0	0	0	0	0	0	0	1	1	0	1	120.24	0	9.542	0	2.08	0	1.96	34.04	0	1.08
TB	83	0	0	0	0	0	0	0	0	1	0	1	0	0	0	0	0	1	38.76	0.0022	5.39	28.28	0.28	0	0.8	40.56	0.64	1
TB	80	1	0	0	1	0	0	0	0	0	0	0	0	0	0	1	0	0	87.8	0	7.016	39.12	12.48	0	0.96	82.68	4.8	0
TB	89	1	0	0	0	0	1	0	0	0	0	0	0	0	0	0	0	0	113.04	0.0415	4.979	24.32	0.08	0	0.48	12.4	0.8	1.36
TB	97	0	0	0	0	0	1	0	0	0	0	1	0	0	1	1	0	0	301.28	0.0367	4.135	0	0	0	0.96	17.92	0	0.6
TB	66	1	0	0	0	0	0	0	0	0	0	0	0	0	1	1	0	1	271.72	0.1135	9.636	166.2	10.84	35.4	18.96	69.52	10.12	37.52
TB	72	1	0	0	0	0	0	1	0	0	0	0	0	0	1	1	1	1	296.24	0.1429	8.78	0	5.92	0	1.36	22.36	2.24	0
TB	58	1	0	0	0	0	0	0	0	0	0	1	0	0	0	1	1	1	73.36	0.1579	8.064	0	0	0.12	0.8	40.16	0	0
TB	79	0	0	0	0	0	0	1	0	0	0	0	0	0	1	1	0	0	113.76	0	0.721	0	33.16	0	1.44	18.24	2.04	0.2
TB	88	1	0	0	0	0	0	1	0	0	1	0	0	0	1	1	1	0	236.36	0.3097	0.557	0	3.44	2.44	1.24	11.44	2.4	0
TB	66	0	0	0	0	1	0	0	0	0	0	0	0	0	1	1	0	0	84.92	0.0145	2	0	0.04	0.52	0.92	3.48	1.88	1.56
TB	81	1	0	0	0	0	0	1	0	0	0	1	0	1	1	1	1	0	746.28	0.0166	3.478	2.8	0	0.84	0.48	3.36	0.56	3
TB	87	0	0	0	0	0	0	1	0	0	0	0	0	0	1	1	0	1	428.24	0.0529	3.431	0	2.28	0	4.4	89.48	0	0
TB	84	1	0	0	0	0	1	0	0	0	0	0	0	1	1	1	0	0	204.64	0.0889	0	33.12	0	0	0.4	11.28	0	1.16
TB	68	1	0	0	0	0	0	0	1	0	0	0	0	0	1	1	0	1	277.76	0.0595	3.982	30.2	7.52	0.52	0.68	29.44	2.4	0.32
TB	84	1	0	0	0	0	1	0	0	0	0	0	0	0	0	1	1	1	548.76	0.1138	4.393	0	45.36	0.84	3.24	44.24	0.28	0
TB	87	1	0	0	0	0	0	0	0	0	0	0	0	0	1	1	0	0	86.04	0.049	2.762	41.2	0.52	0	1.52	13.64	1.28	0
TB	23	1	0	0	0	0	0	0	0	0	0	0	0	0	1	0	1	0	163.4	0.0142	2.375	19.16	13.72	0.4	0.24	5.2	0	0.52
TB	60	1	0	0	0	0	0	0	0	0	0	1	0	0	0	0	0	0	105.56	0.0304	2.68	0	7.64	0	2.96	8.92	0	0.04
TB	89	0	0	1	0	0	0	1	0	0	0	0	0	0	1	1	0	0	298.56	0.0286	1.777	0	0	0	0	4.4	1.88	0
TB	80	0	1	0	0	0	0	0	0	0	0	1	0	0	1	0	0	0	229.68	0.1897	8.885	0	13.56	0	0.76	45.96	1.08	0.72
TB	100	0	0	0	0	0	0	0	0	0	0	0	0	0	1	1	0	0	385.64	0.2815	0.874	0	1.72	0	1.6	110.52	0	0
TB	78	1	0	0	0	0	0	0	0	0	0	0	0	0	0	0	0	1	403.2	0.0103	8.041	0	34.6	0	1.24	78.88	0	0.36
TB	73	1	0	0	0	0	0	1	0	0	0	1	0	0	1	1	0	1	256.32	0.0175	2.973	0	4.16	0	2.56	70.44	1.68	0
Non-TB	85	0	0	1	0	0	0	0	0	0	0	0	0	0	0	0	0	0	118.8	0	2.868	0	0	0	0.76	24.96	1.4	0.16
Non-TB	80	1	0	0	0	0	0	0	1	0	0	0	0	0	0	0	0	0	167.12	0.0025	2.704	0	6.08	0	9.12	36.32	0	0
Non-TB	63	1	0	0	0	0	0	0	0	0	0	0	0	0	0	0	0	0	79.12	0	11.243	32.04	2.76	0	0.8	19.76	0	0.92
Non-TB	79	1	0	0	1	0	0	1	0	1	0	1	0	0	0	1	0	0	45.96	0	5.43	0	58.08	0	4.24	1010.72	2	0
Non-TB	62	1	0	0	0	0	0	1	1	0	0	0	0	0	0	0	0	0	141.88	0	4.017	0	1.52	0	1.2	52.76	0	1.08
Non-TB	76	1	0	0	0	0	0	1	0	0	1	0	0	0	1	0	0	0	116.64	0	8.498	11.2	0	0	1.84	84.2	0	1.2
Non-TB	74	1	0	0	1	0	0	1	0	0	0	1	0	0	1	0	0	0	124.56	0	15.067	0	0	0	4.12	1521.56	0.64	0
Non-TB	68	0	0	0	0	0	0	0	0	0	0	0	0	0	1	1	0	0	214	0	4.393	32.76	0.32	0	1.04	115.48	1.48	0
Non-TB	69	1	0	0	0	0	0	0	0	0	0	0	1	0	1	1	0	0	144.04	0.0169	10.844	0	0	0	12.04	720.8	1.4	0.44
Non-TB	74	1	0	1	1	0	0	0	0	0	0	1	0	0	1	1	0	0	229.16	0.0778	8.487	0	0	0	1.36	40.16	0	0.72
Non-TB	68	0	0	0	0	0	0	0	0	0	1	0	0	0	0	0	0	0	153.44	0.0025	11.49	7.32	0	1.24	2.32	65.68	0	0
Non-TB	75	1	0	0	0	0	0	1	1	0	0	1	0	1	0	0	0	0	70.48	0	9.46	23.48	0.16	0.12	1.52	177.4	0.84	0
Non-TB	71	1	1	0	0	0	0	0	1	0	0	0	0	0	0	0	0	0	92.12	0	9.566	0	0	0	1.52	24.24	0	0.36
Non-TB	91	1	0	0	0	0	0	0	0	0	0	0	0	0	0	1	1	0	415.24	0.0121	3.9	0	0.08	0.56	2.08	527.24	0	1.44
Non-TB	80	1	0	0	1	0	0	0	0	0	0	0	0	0	1	0	0	0	55.32	0	8.945	145.2	0	2.6	178.8	6252.2	6	7.2
Non-TB	60	1	0	0	0	0	0	0	0	0	0	0	0	0	1	1	1	0	137.56	0	26.715	91	0	0	3.2	85.2	3.2	6.8
Non-TB	64	1	0	0	0	0	1	0	0	0	0	0	0	0	1	1	0	0	358.28	0	15.689	9.08	0	0.36	1	2.48	0.4	0
Non-TB	41	1	0	0	0	0	0	0	0	0	0	0	1	0	1	0	0	0	123.12	0	1.179	0	5.64	1.96	5.4	118.16	2	0
Non-TB	76	1	0	0	1	0	0	0	0	0	0	0	0	0	0	1	0	0	213.28	0	17.026	0	0	0	4.4	259.84	1.8	2.64
Non-TB	55	1	0	0	0	0	0	1	0	0	0	0	0	0	1	0	0	0	50.28	0	20.265	0	13.4	0	4	1562.2	0	1
Non-TB	90	1	0	0	0	0	0	1	0	0	0	0	0	0	1	0	0	0	73.36	0.0094	5.132	0	0	0	1	45.64	1.2	0
Non-TB	76	1	1	0	0	0	0	1	0	0	0	0	0	0	0	0	0	0	342.4	0.0403	7.56	0	0	0	1.52	35.36	3.2	0
Non-TB	69	1	0	0	0	0	0	0	0	0	0	0	0	0	1	0	1	0	164.96	0.0091	8.111	23.48	0	0	0.6	84.72	0.12	0
Non-TB	73	0	0	0	0	1	0	0	0	0	0	0	0	0	1	1	0	0	53.88	0.0079	13.648	0	0	0	24.32	548.28	1.48	0
Non-TB	80	0	0	0	0	0	0	0	0	0	0	0	0	0	1	0	0	0	111.6	0	12.229	0	0	0	6.32	265.88	0.28	0
Non-TB	79	1	0	0	0	0	0	0	0	0	0	0	0	0	0	1	0	0	66.16	0	3.009	0	0	0	2.84	80.56	0.12	0.96
Non-TB	69	1	0	0	0	0	0	0	0	0	0	0	0	0	1	1	1	0	158.48	0.0073	7.302	23.48	0	0	3.08	279.96	0	1.08
Non-TB	86	1	0	0	1	0	1	0	0	0	0	0	0	0	1	0	1	0	164.96	0.0697	8.815	0	0	0	1.48	206.96	2.16	0.68
